# Supplementary material for: A room-temperature solid-state route for the synthesis of graphene oxide–metal sulfide composites with excellent photocatalytic activity
Source: Royal Society of Chemistry journal article supplement (doi:10.1039/c3ce40079d), 2013-01-01
Supplement: c3ce40079d.pdf [file c3ce40079d.pdf]

## **Electronic Supplementary Information**

# **A room-temperature solid-state route for the synthesis of graphene oxide-metal sulfide composites with excellent photocatalytic activity**

Feng-Juan Chen, Ya-Li Cao and Dian-Zeng Jia<sup>\*</sup>

Key Laboratory of Advanced Functional Materials of Autonomous Region, Key Laboratory of  
Clean Energy Material and Technology of Ministry of Education, Institute of Applied Chemistry,  
Xinjiang University, 830046, Xinjiang, P. R. China

Corresponding author. Tel.: +86-0991-8583083; Fax: +86-0991-8580032.

E-mail address: [jdz0991@gmail.com](mailto:jdz0991@gmail.com)

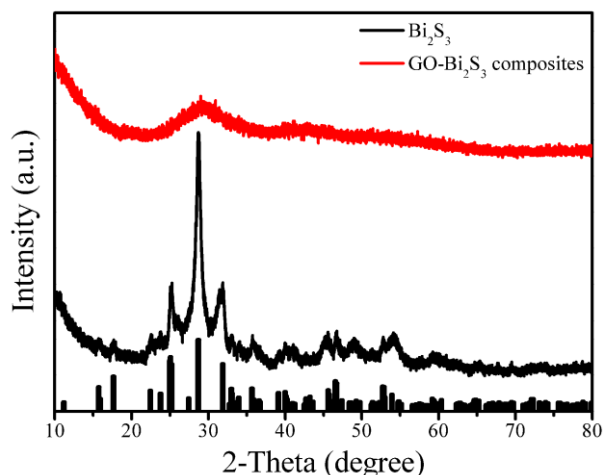

**Fig. S1** XRD patterns of  $\text{Bi}_2\text{S}_3$  and GO- $\text{Bi}_2\text{S}_3$  composites.

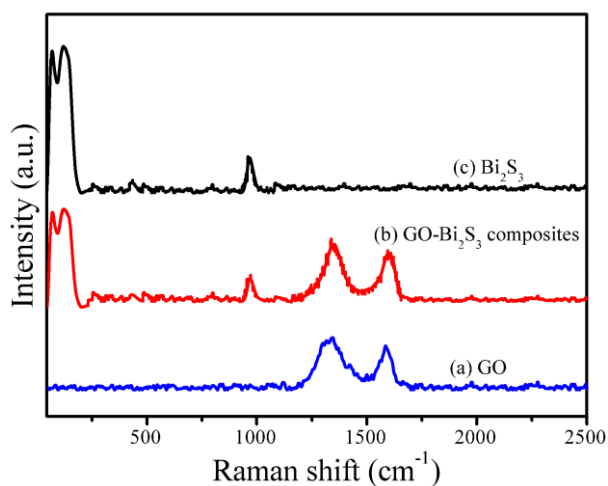

**Fig. S2** Raman spectra of GO,  $\text{Bi}_2\text{S}_3$  and GO- $\text{Bi}_2\text{S}_3$  composites.

The XRD, Raman characterizations of  $\text{Bi}_2\text{S}_3$  and GO- $\text{Bi}_2\text{S}_3$  composites were also investigated. As shown in Fig. S1, the characteristic diffraction peaks of  $\text{Bi}_2\text{S}_3$  are in good agreement with that of orthorhombic  $\text{Bi}_2\text{S}_3$  (JCPDS card no. 65-2431). The obtained GO- $\text{Bi}_2\text{S}_3$  composites displays similar XRD pattern to  $\text{Bi}_2\text{S}_3$ , indicating the formation of  $\text{Bi}_2\text{S}_3$ . However, a broad diffraction peak at  $29.0^\circ$  was observed, implying the relatively small crystallite sizes of  $\text{Bi}_2\text{S}_3$  nanoparticles in the composites.<sup>50</sup>

As presented in Fig. S2, features corresponding to the D and G band of GO and GO- $\text{Bi}_2\text{S}_3$  composites were observed. The typical bands of GO can be found at 1341  $\text{cm}^{-1}$  and 1581  $\text{cm}^{-1}$ , corresponding to the D and G bands, respectively. Whereas the G

band for the GO-Bi<sub>2</sub>S<sub>3</sub> composites shifted to 1597 cm<sup>-1</sup>, indicating the chemical interaction GO and Bi<sub>2</sub>S<sub>3</sub>.<sup>51</sup> The Raman spectra of GO-Bi<sub>2</sub>S<sub>3</sub> composites and pure Bi<sub>2</sub>S<sub>3</sub> show similar features in the range of 45-1000 cm<sup>-1</sup>, indicated the presence of Bi<sub>2</sub>S<sub>3</sub> in the GO-Bi<sub>2</sub>S<sub>3</sub> composites. On the other hand, the calculated I<sub>(D)</sub>/I<sub>(G)</sub> ratios for GO and GO-Bi<sub>2</sub>S<sub>3</sub> composites were 1.13 and 1.20, respectively. The increased I<sub>(D)</sub>/I<sub>(G)</sub> ratio of the GO-Bi<sub>2</sub>S<sub>3</sub> composites is a clear indication of the increase of reduction level, which is in agreement with the Raman results of the GO-ZnS composites.

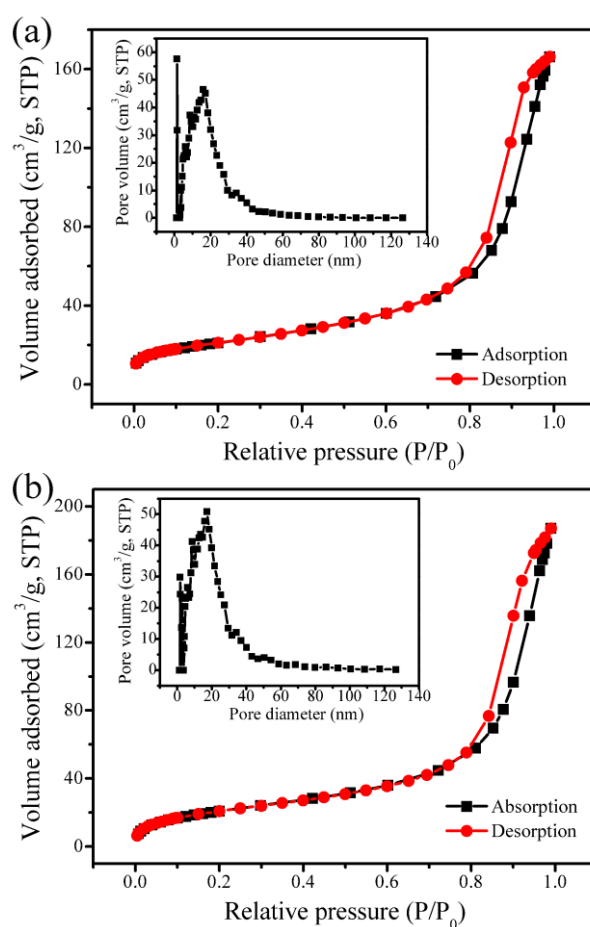

**Fig. S3** Nitrogen adsorption-desorption isotherms and the corresponding DFT pore size distributions (insets) of CdS (a) and GO-CdS composites (b).

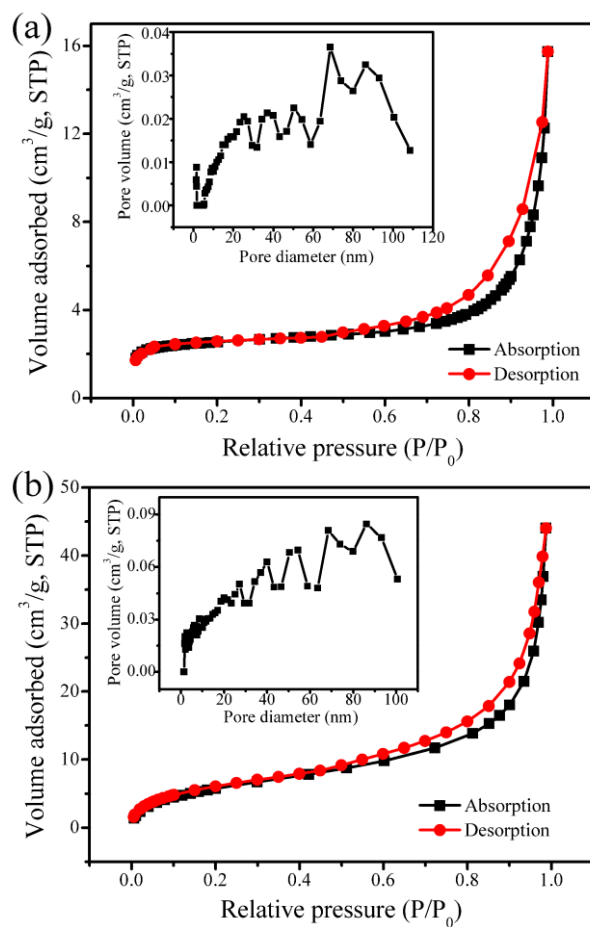

**Fig. S4** Nitrogen adsorption-desorption isotherms and the corresponding DFT pore size distributions (insets) of  $\text{Bi}_2\text{S}_3$  (a) and GO- $\text{Bi}_2\text{S}_3$  composites (b).

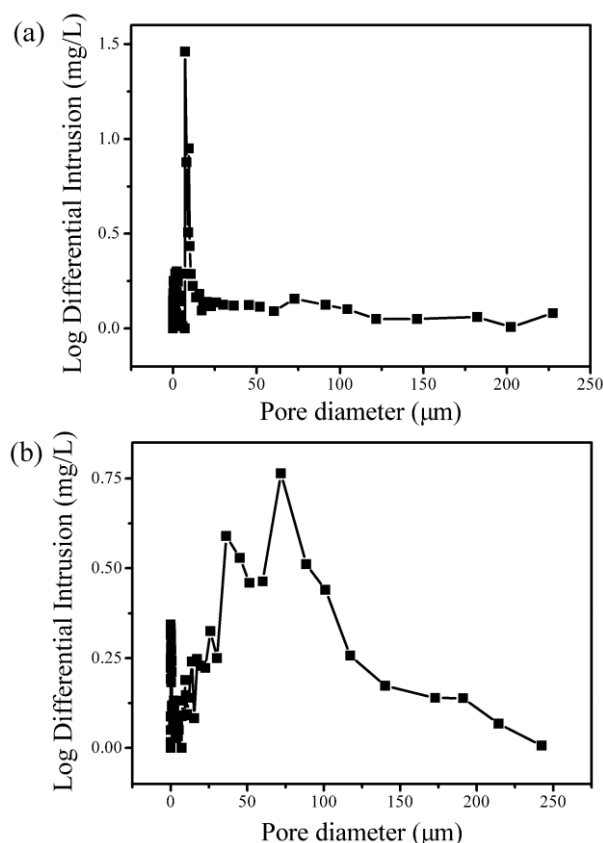

**Fig. S5** Pore size distributions of Bi<sub>2</sub>S<sub>3</sub> (a) and GO-Bi<sub>2</sub>S<sub>3</sub> composites (b) tested by the high pressure of mercury.

As shown in Fig. S4, the nitrogen adsorption-desorption isotherms of Bi<sub>2</sub>S<sub>3</sub> and GO-Bi<sub>2</sub>S<sub>3</sub> composites were measured to find the information about the specific surface area. It can be seen that Bi<sub>2</sub>S<sub>3</sub> and GO-Bi<sub>2</sub>S<sub>3</sub> composites possess a Type IV adsorption-desorption isotherms curves, as previously reported.<sup>52</sup> The isotherms curves revealed type H3 hysteresis loops, which are typical for open slit-shaped capillaries with wide bodies and narrow necks.<sup>53</sup> In addition, the corresponding pore size distributions from DFT method (insets of Fig. S4) show a distribution ranging from 2 to 100 nm, while the pore size distributions tested by the high pressure of mercury suggest the existence of macropores for the samples (Fig. S5). The above results indicated that there are mesopores and macropores in the materials. The determined specific surface area of GO-Bi<sub>2</sub>S<sub>3</sub> composites is 21.9 m<sup>2</sup> g<sup>-1</sup>, larger than that of Bi<sub>2</sub>S<sub>3</sub> (8.6 m<sup>2</sup> g<sup>-1</sup>), which can probably enhance the photocatalytic activity of GO-Bi<sub>2</sub>S<sub>3</sub> composites.

In addition, the degradation kinetic of MO was also investigated. The first-order model<sup>55</sup> can be expressed as follows,  $\ln(C_0/C) = kt$ , where,  $C_0$  and  $C$  are the dye concentration at time 0 and  $t$  min, respectively,  $k$  is the first order reaction rate constant. Fig. S6, S7 and S8 depict the photocatalytic degradation kinetics of MO. It can be seen that the curves of  $\ln(C_0/C)$  versus irradiation time approach to linear, indicating a rather good correlation to the first-order reaction kinetic. The determined  $k$  values for ZnS, GO-ZnS composites, CdS, GO-CdS composites,  $\text{Bi}_2\text{S}_3$  and GO- $\text{Bi}_2\text{S}_3$  composites are  $0.00609 \text{ min}^{-1}$ ,  $0.02558 \text{ min}^{-1}$ ,  $0.00481 \text{ min}^{-1}$ ,  $0.01362 \text{ min}^{-1}$ ,  $0.00734 \text{ min}^{-1}$  and  $0.01204 \text{ min}^{-1}$ , respectively. It indicates that the  $k$  values of GO-ZnS composites, GO-CdS composites and GO- $\text{Bi}_2\text{S}_3$  composites are higher than that of ZnS, CdS and  $\text{Bi}_2\text{S}_3$  (The higher  $k$  value means a higher degradation ratio of MO), respectively. The results suggest that GO-ZnS composites, GO-CdS composites and GO- $\text{Bi}_2\text{S}_3$  composites possess higher photocatalytic activity than that of ZnS, CdS and  $\text{Bi}_2\text{S}_3$ , which is consistent with the conclusions of photocatalytic degradation curves presented in Fig. 6a, Fig. 9a and 10a.

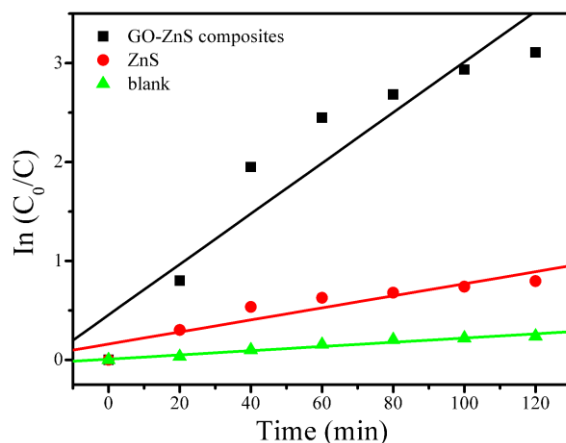

**Fig. S6**  $\ln(C_0/C)$  versus irradiation times for the degradation of MO.

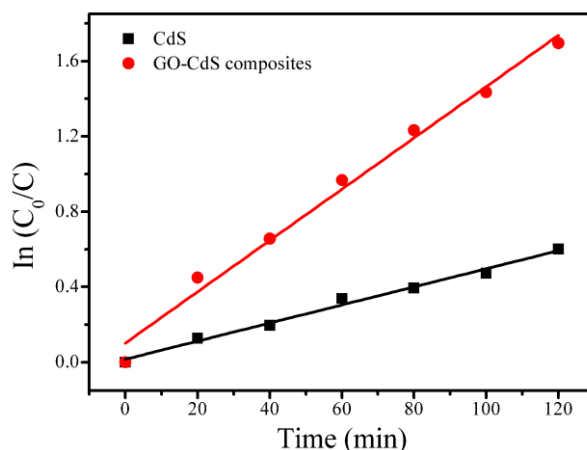

**Fig. S7**  $\ln(C_0/C)$  versus irradiation times for the degradation of MO.

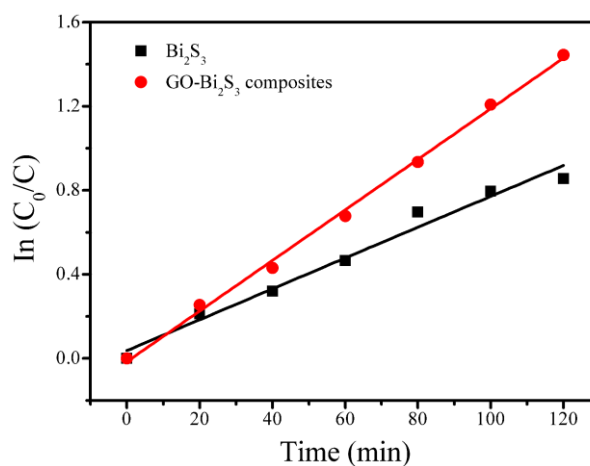

**Fig. S8**  $\ln(C_0/C)$  versus irradiation times for the degradation of MO.

### Notes and references

- 50 Q. Li, B. D. Guo, J. G. Yu, J. R. Ran, B. H. Zhang, H. J. Yan and J. R. Gong, *J. Am. Chem. Soc.*, 2011, **133**, 10878.
- 51 F. Zhang, H. Q. Cao, D. M. Yue, J. X. Zhang and M. Z. Qu, *Inorg. Chem.*, 2012, **51**, 8544.
- 52 F. A. A. Barros, A. J. R. Castro, J. M. Filho, B. C. Viana, A. Campos and A. C. Oliveira, *J. Nanopart. Res.*, 2012, **14**, 1096.
- 53 X. Y. Zhang, H. P. Li, X. L. Cui and Y. H. Lin, *J. Mater. Chem.*, 2010, **20**, 2801.
- 55 J. G. Hou, Z. Wang, S. Q. Jiao and H. M. Zhu, *CrystEngComm*, 2012, **14**, 5923.
